# Supplementary material
Source: PubMed Central journal article supplement (PMC4415984)
Supplement: NIHMS659681-supplement-01.pdf [file NIHMS659681-supplement-01.pdf]

Supplemental Table 1. Description of the study population for all cycles included in the calculation of live birth rate.

|                                 |                            | Oocyte Source and Day of Transfer |          |         |          |          |         |
|---------------------------------|----------------------------|-----------------------------------|----------|---------|----------|----------|---------|
|                                 |                            | Autologous                        |          |         | Donor    |          |         |
|                                 |                            | Day 2-3                           | Day 5-6  | P Value | Day 2-3  | Day 5-6  | P Value |
| (N)                             |                            | 103,852                           | 90,775   |         | 14,744   | 22,444   |         |
| Maternal                        | Mean (SD)                  | 34.2±4.6                          | 33.2±4.1 | <0.0001 | 41.4±4.9 | 41.3±4.9 | 0.41    |
| Age (years)                     | 18-29                      | 18.4                              | 22.6     | <0.0001 | 2.6      | 2.6      | 0.91    |
|                                 | 30-34                      | 39.4                              | 43.3     |         | 8.6      | 8.6      |         |
|                                 | 35-37                      | 21.0                              | 21.3     |         | 10.5     | 10.8     |         |
|                                 | 38-40                      | 12.8                              | 10.3     |         | 18.7     | 19.0     |         |
|                                 | 41-43                      | 6.7                               | 2.4      |         | 28.6     | 28.4     |         |
|                                 | ≥44                        | 1.6                               | 0.3      |         | 31.0     | 30.6     |         |
| Race/Ethnicity (%)              | White                      | 74.7                              | 73.3     | <0.0001 | 79.1     | 75.7     | <0.0001 |
|                                 | Hispanic                   | 11.3                              | 14.0     |         | 5.0      | 5.6      |         |
|                                 | Asian                      | 6.2                               | 6.8      |         | 8.6      | 11.0     |         |
|                                 | Black                      | 4.2                               | 4.4      |         | 5.6      | 5.6      |         |
|                                 | Mixed                      | 1.2                               | 1.7      |         | 1.3      | 1.7      |         |
|                                 | Other                      | 0.5                               | 0.6      |         | 0.4      | 0.5      |         |
|                                 | Unknown                    | 38.0                              | 34.4     | 41.5    | 35.8     |          |         |
| Prior Births (%)                | 0                          | 77.3                              | 76.3     | <0.0001 | 75.1     | 73.8     | 0.016   |
|                                 | 1                          | 16.4                              | 16.0     |         | 16.9     | 18.0     |         |
|                                 | ≥2                         | 6.3                               | 7.7      |         | 8.0      | 8.2      |         |
| Number of Diagnoses (%)         | 1                          | 80.2                              | 81.1     | <0.0001 | 77.3     | 75.5     | <0.0001 |
|                                 | ≥2                         | 19.8                              | 18.9     |         | 22.7     | 24.5     |         |
| Diagnosis (%)                   | Male factor                | 39.4                              | 39.0     | 0.13    | 18.1     | 19.5     | 0.0011  |
|                                 | Endometriosis              | 12.8                              | 11.3     | <0.0001 | 7.0      | 6.6      | 0.23    |
|                                 | Ovulation Disorders        | 14.1                              | 20.3     | <0.0001 | 4.6      | 5.2      | 0.0031  |
|                                 | Diminished Ovarian Reserve | 15.2                              | 8.2      | <0.0001 | 72.0     | 76.7     | <0.0001 |
|                                 | Tubal factors (all)        | 18.8                              | 18.5     | 0.063   | 8.6      | 7.8      | 0.011   |
|                                 | Tubal ligation             | 2.9                               | 3.1      | 0.0031  | 1.6      | 1.5      | 0.49    |
|                                 | Tubal Hydrosalpinx         | 1.4                               | 1.6      | 0.0048  | 0.5      | 0.5      | 0.83    |
|                                 | Tubal-Other                | 14.1                              | 13.4     | <0.0001 | 6.3      | 5.6      | 0.0016  |
|                                 | Uterine factor             | 4.0                               | 3.9      | 0.48    | 4.2      | 4.5      | 0.30    |
|                                 | Other factor               | 10.7                              | 13.8     | <0.0001 | 18.5     | 17.7     | 0.050   |
| Unexplained                     | 14.7                       | 13.8                              | <0.0001  | 3.9     | 3.3      | 0.0058   |         |
| Number of Oocytes Retrieved (%) | 1-5                        | 25.7                              | 3.1      | <0.0001 | 4.8      | 0.6      | <0.0001 |
|                                 | 6-10                       | 30.3                              | 18.4     |         | 20.1     | 9.0      |         |
|                                 | 11-15                      | 21.6                              | 28.1     |         | 26.1     | 20.7     |         |
|                                 | 16-25                      | 18.0                              | 37.3     |         | 34.0     | 43.0     |         |
|                                 | ≥26                        | 4.4                               | 13.0     |         | 15.0     | 26.7     |         |

Supplemental Table 2. Description of the study population for cycles which led to a singleton live birth

|                                 |                            | Oocyte Source and Day of Transfer |                     |         |                    |                     |         |
|---------------------------------|----------------------------|-----------------------------------|---------------------|---------|--------------------|---------------------|---------|
|                                 |                            | Autologous                        |                     |         | Donor              |                     |         |
|                                 |                            | Day 2-3<br>(N)                    | Day 5-6<br>(26,311) | P Value | Day 2-3<br>(4,643) | Day 5-6<br>(29,567) | P Value |
| Maternal                        | Mean (SD)                  | 32.9 (3.9)                        | 32.9 (3.9)          | 0.99    | 41.3 (4.8)         | 41.4 (4.8)          | 0.41    |
| Age (years)                     | 18-29                      | 22.8                              | 23.4                |         | 2.6                | 2.3                 |         |
|                                 | 30-34                      | 47.1                              | 45.6                |         | 8.8                | 8.8                 |         |
|                                 | 35-37                      | 20.8                              | 21.0                |         | 10.5               | 10.3                |         |
|                                 | 38-40                      | 7.6                               | 8.8                 |         | 18.6               | 19.1                |         |
|                                 | 41-43                      | 1.6                               | 1.2                 |         | 29.3               | 28.5                |         |
|                                 | ≥44                        | 0.1                               | 0.1                 |         | 30.2               | 31.0                |         |
| Race/Ethnicity (%)              | White                      | 78.6                              | 75.8                | <0.0001 | 81.4               | 77.6                | <0.0001 |
|                                 | Hispanic                   | 6.5                               | 7.0                 |         | 4.3                | 5.2                 |         |
|                                 | Asian                      | 8.6                               | 9.4                 |         | 8.5                | 10.8                |         |
|                                 | Black                      | 4.9                               | 5.6                 |         | 4.7                | 4.3                 |         |
|                                 | Mixed                      | 1.0                               | 1.7                 |         | 1.1                | 1.7                 |         |
|                                 | Other                      | 0.4                               | 0.5                 |         | 0.1                | 0.4                 |         |
|                                 | Unknown                    | 37.6                              | 34.5                |         | 41.2               | 36.4                |         |
| Prior Births (%)                | 0                          | 78.0                              | 76.9                | <0.0001 | 75.3               | 73.7                | 0.16    |
|                                 | 1                          | 16.1                              | 16.2                |         | 17.7               | 18.7                |         |
|                                 | ≥2                         | 5.9                               | 6.9                 |         | 7.0                | 7.6                 |         |
| Number of Diagnoses (%)         | 1                          | 82.1                              | 82.0                | 0.85    | 78.8               | 76.1                | 0.0007  |
|                                 | ≥2                         | 17.9                              | 18.0                |         | 21.2               | 23.9                |         |
| Diagnosis (%)                   | Male factor                | 41.3                              | 39.8                | 0.0006  | 17.9               | 19.4                | 0.033   |
|                                 | Endometriosis              | 13.3                              | 11.4                | <0.0001 | 6.5                | 6.4                 | 0.79    |
|                                 | Ovulation Disorders        | 16.3                              | 20.8                | <0.0001 | 4.2                | 5.1                 | 0.016   |
|                                 | Diminished Ovarian Reserve | 8.8                               | 6.8                 | <0.0001 | 72.8               | 77.3                | <0.0001 |
|                                 | Tubal factors (all)        | 17.7                              | 17.1                | 0.043   | 7.2                | 6.4                 | 0.083   |
|                                 | Tubal ligation             | 2.9                               | 2.7                 | 0.38    | 1.0                | 1.2                 | 0.30    |
|                                 | Tubal Hydrosalpinx         | 1.2                               | 1.4                 | 0.0084  | 0.6                | 0.5                 | 0.61    |
|                                 | Tubal-Other                | 13.4                              | 12.5                | 0.0047  | 5.6                | 4.5                 | 0.0063  |
|                                 | Uterine factor             | 2.9                               | 3.4                 | 0.0006  | 3.9                | 4.0                 | 0.81    |
|                                 | Other factor               | 9.8                               | 12.9                | <0.0001 | 18.4               | 17.7                | 0.271   |
| Unexplained                     | 15.9                       | 14.8                              | 0.0002              | 4.2     | 3.2                | 0.0063              |         |
| Number of Oocytes Retrieved (%) | 1-5                        | 15.7                              | 2.3                 | <0.0001 | 3.6                | 0.5                 | <0.0001 |
|                                 | 6-10                       | 30.9                              | 17.6                |         | 18.7               | 8.9                 |         |
|                                 | 11-15                      | 25.8                              | 28.2                |         | 26.0               | 20.7                |         |
|                                 | 16-25                      | 22.2                              | 38.6                |         | 35.8               | 42.5                |         |
|                                 | ≥26                        | 5.4                               | 13.2                |         | 16.0               | 27.4                |         |
| Infant Gender (%)               | Male                       | 49.2                              | 51.3                | <0.0001 | 49.3               | 52.0                | 0.0021  |
